# Supplementary material for: Control of homologous recombination by the HROB–MCM8–MCM9 pathway
Source: PubMed Central journal article supplement — Genes Dev. 2019 Oct 1;33(19-20):1397–415. doi: 10.1101/gad.329508.119 (PMC6771392; doi:10.1101/gad.329508.119), 2019-10-01
Supplement: supp_gad.329508.119_Supplemental_Figures_S1-S13.pdf [file supp_gad.329508.119_Supplemental_Figures_S1-S13.pdf]

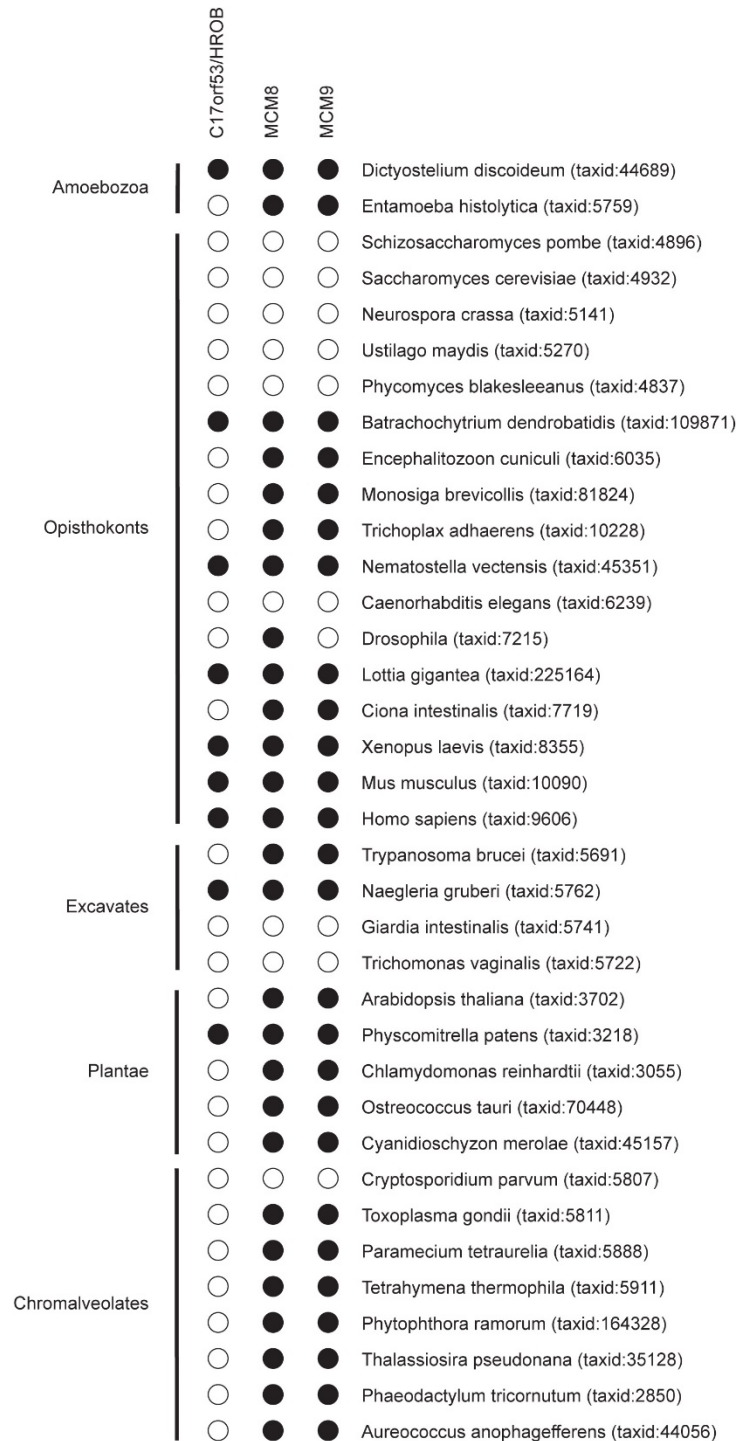

### Supplemental Figure S2: HROB homologs were found in many metazoan organisms.

This figure is related to Figure 2A.

The human HROB amino acid sequence was used as input for a BLASTP search of the non-redundant protein sequence (nr) databases of the indicated organisms. Black circles: a protein with at least 25% sequence identity to human HROB and an E-value  $\leq 0.001$  was found; white circles, no protein with the above characteristics was found. Data for MCM8 and MCM9 are from ref(Liu et al. 2009).

**A**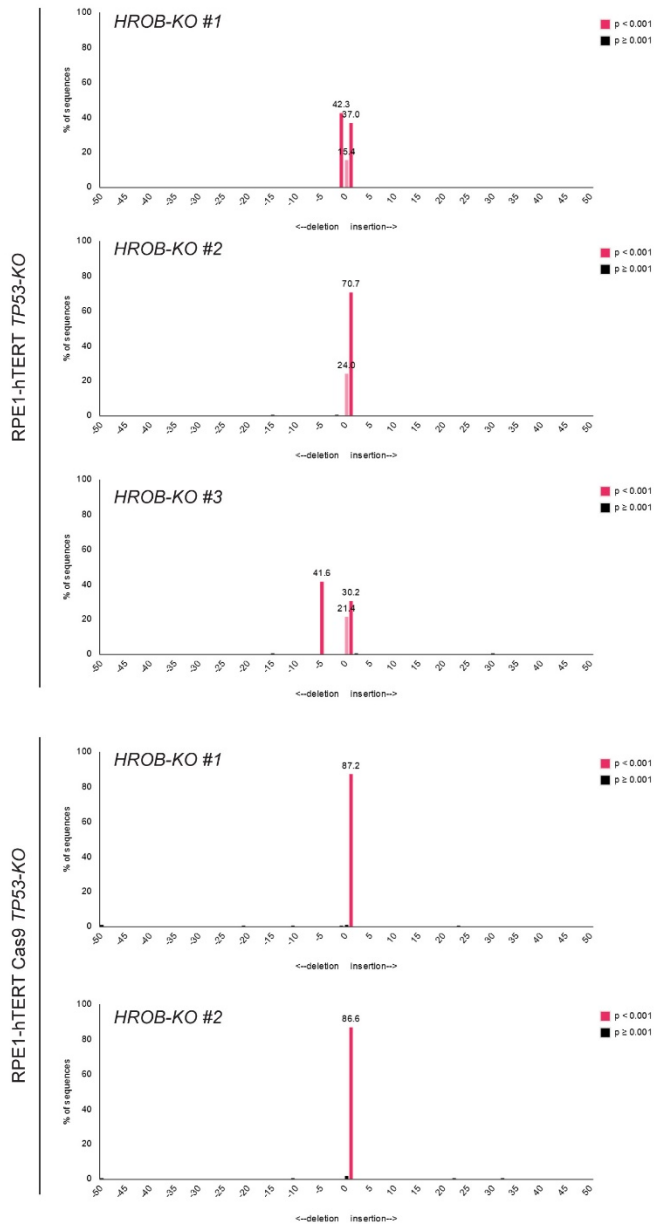**B**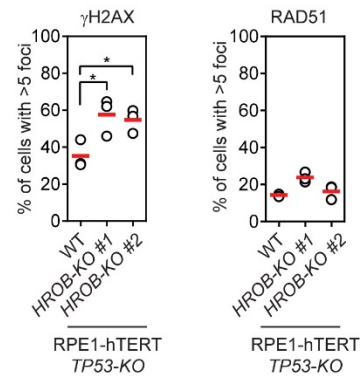

### Supplemental Figure S3: Validation of clonal *HROB*-KO cell lines by TIDE analysis and elevated levels of spontaneous $\gamma$ H2AX in *HROB*-KO cells

This Figure is related to Figure 2B.

**A**, PCR was used to amplify the region surrounding the *HROB* sgRNA targeting site. TIDE analysis of sequences from the indicated clones that was used to assess indel formation in *HROB* gene knockouts. **B**, Quantification of spontaneous  $\gamma$ H2AX (left) or RAD51/ $\gamma$ H2AX colocalizing (right) foci in the indicated RPE1 cell lines. Red line indicates mean ( $n=3$  biologically independent experiments).  $*P \leq 0.05$ .  $P$ -values are from paired two-tailed  $t$ -tests.

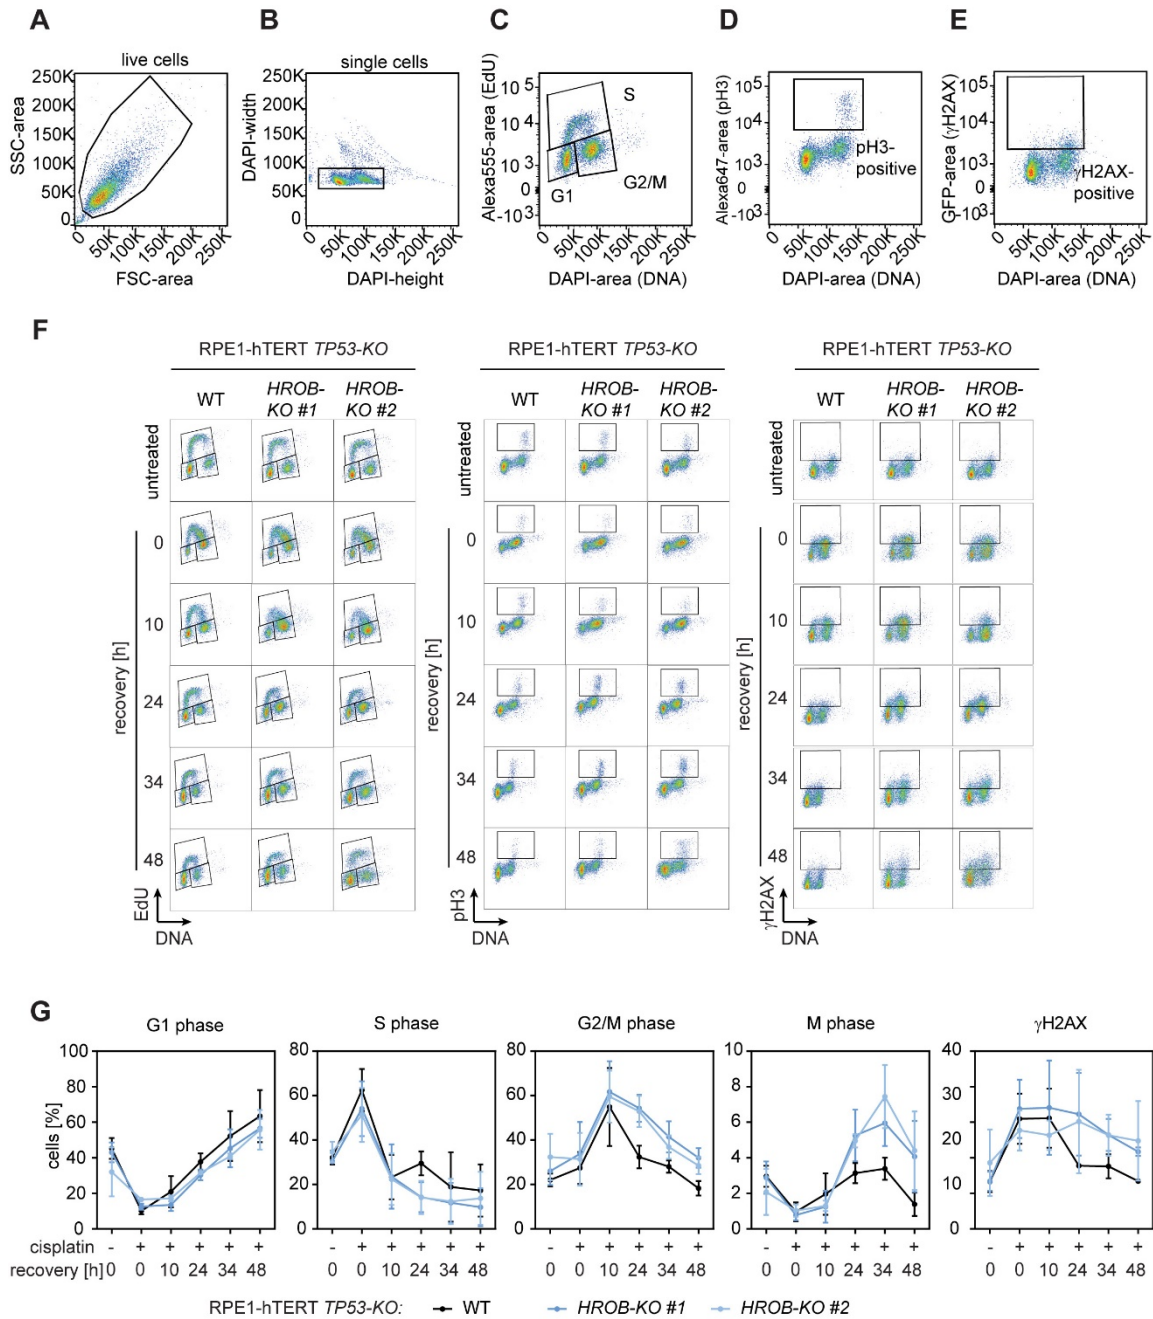

### Supplemental Figure S4: *HROB-KO* cells accumulate in G2/M phase after cisplatin treatment.

This figure is related to Figure 3B.

**A-E**, Gating strategy for fluorescence activated cell sorting (FACS) analysis of different cell cycle stages and DNA damage signalling. **A**, Live cells were gated from total cell populations as indicated. **B**, Single cells were gated from live cells as indicated. **C-E**, G1 phase, S phase, G2/M phase (from EdU incorporation), phospho-histone H3 (pH3)-positive (M phase) and  $\gamma$ H2AX-positive cells were gated from single cells as indicated. **F**, Representative graphs of FACS analysis for cell cycle stages and  $\gamma$ H2AX formation in RPE1 wild type (WT) and the indicated *HROB-KO* cell lines after the indicated times of recovery from cisplatin treatment (for details of experimental setup see Figure 3A). Left, EdU analysis. Middle, pH3 analysis. Right,  $\gamma$ H2AX analysis. Shown are representative data from one experiment. **G**, Quantification of the experiment shown in **F**. Lines connect means. Error bars indicate standard deviation (n=3 biologically independent experiments).

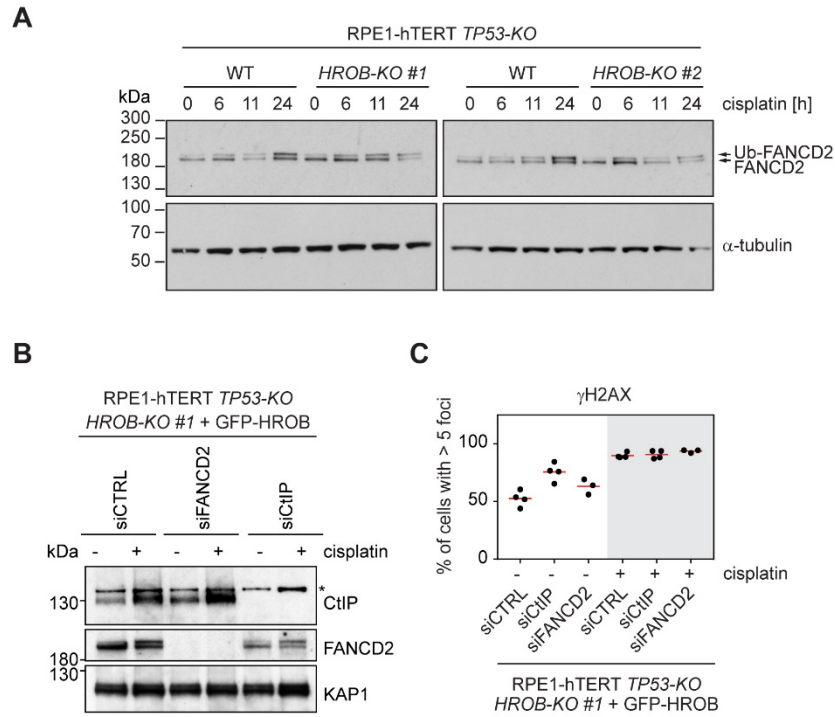

**Supplemental Figure 5: HROB acts downstream of FANCD2 in the response to DNA inter-strand crosslinks.**

This figure is related to Figure 3J.

**A**, Lysates were prepared from RPE1 wild type (WT) or *HROB-KO* cells treated with 4 μM cisplatin for the indicated periods of time and analyzed by immunoblotting with antibodies to FANCD2 or alpha-tubulin (loading control). **B**, **C**, RPE1 *HROB-KO #1* + GFP-HROB cells were transfected with the indicated siRNAs and were left untreated or were treated with 8 μM cisplatin for 4 h before recovery in medium without cisplatin for 20 h. **B**, Lysates from cells transfected with the indicated siRNAs were analyzed by immunoblotting with antibodies to CtIP, FANCD2 or KAP1 (loading control). **C**, Quantification of γH2AX foci in RPE1 *HROB-KO #1* + GFP-HROB cells transfected with the indicated siRNAs, with and without cisplatin treatment. Red line indicates mean (n ≥ 3 biologically independent experiments). siCTRL, non-targeting control siRNA.

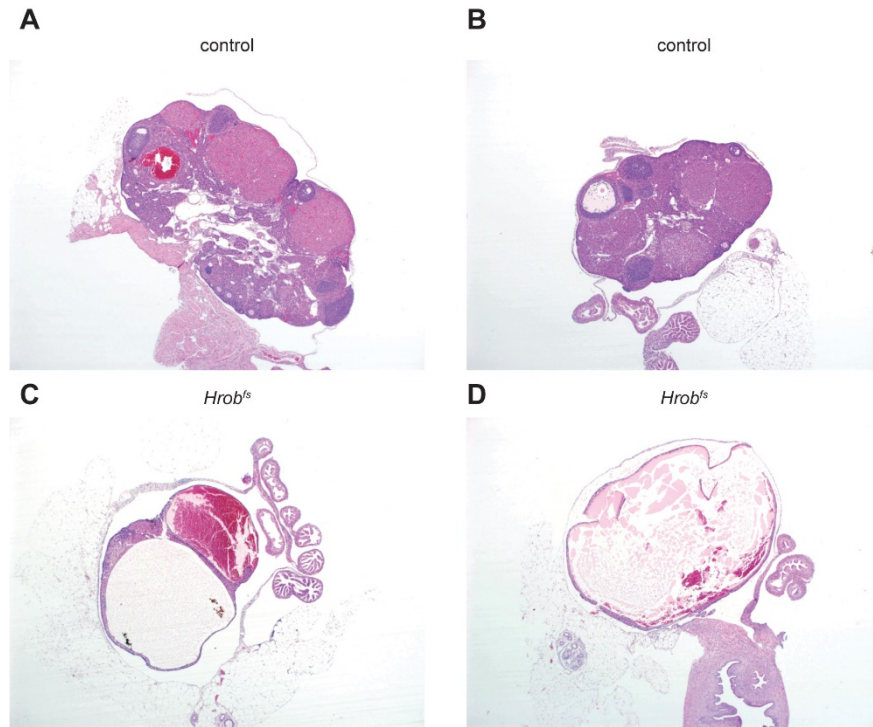

**Supplemental Figure S6: Cystic ovaries in female *HROB*<sup>fs</sup> mutant mice.**

This figure is related to Figure 4.

**A-D**, Ovary sections stained with hematoxylin/eosin. **A, B**, Ovary sections from age-matched C57BL/6 control animals. **C, D**, Ovary sections from *HROB*<sup>fs</sup> mice. **C**, Ovary with two large cysts, one filled with red blood cells. Both cysts contain cells with dark pigment, possibly macrophages. **D**, Ovary with one very large cyst filled with eosinophilic material and some red blood cells. Original images were acquired using a 4x objective.



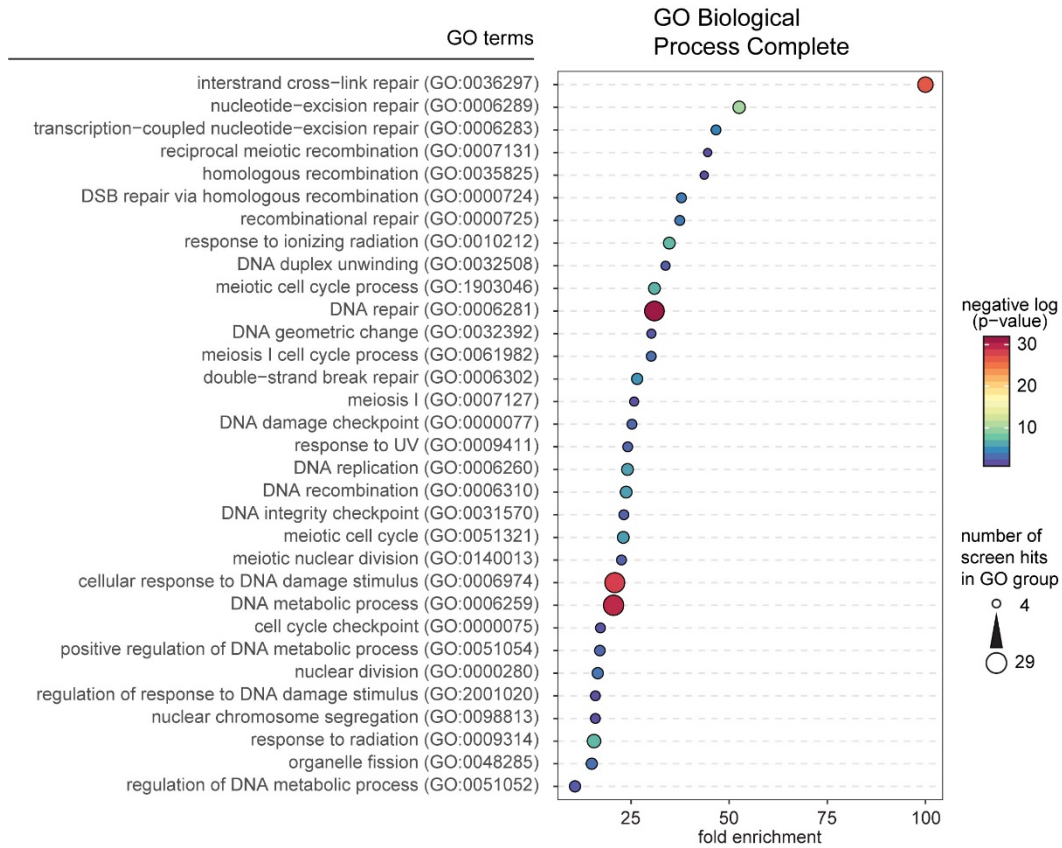

**Supplemental Figure S7: Gene mutations causing cisplatin sensitivity are enriched for ICL repair, NER and HR factors.**

This figure is related to Figure 5A.

Gene Ontology (GO) term enrichment analysis of Biological Process Complete terms of 37 genes that were hits ( $\text{normZ} \leq -7.5$ ) in both RPE1-hTERT Cas9 *TP53-KO* (WT) and RPE1-hTERT Cas9 *TP53-KO HROB-KO #1* (*HROB-KO*) cisplatin sensitivity screens using default settings. Shown are GO terms that are significantly enriched ( $>10$ -fold enrichment and  $P < 0.05$ ; binomial test with Bonferroni correction). Circle size indicates number of genes from 37-gene hit list included in each GO term, color indicates negative log  $P$ -value and x-axis position indicates the fold enrichment compared to the whole genome reference set.

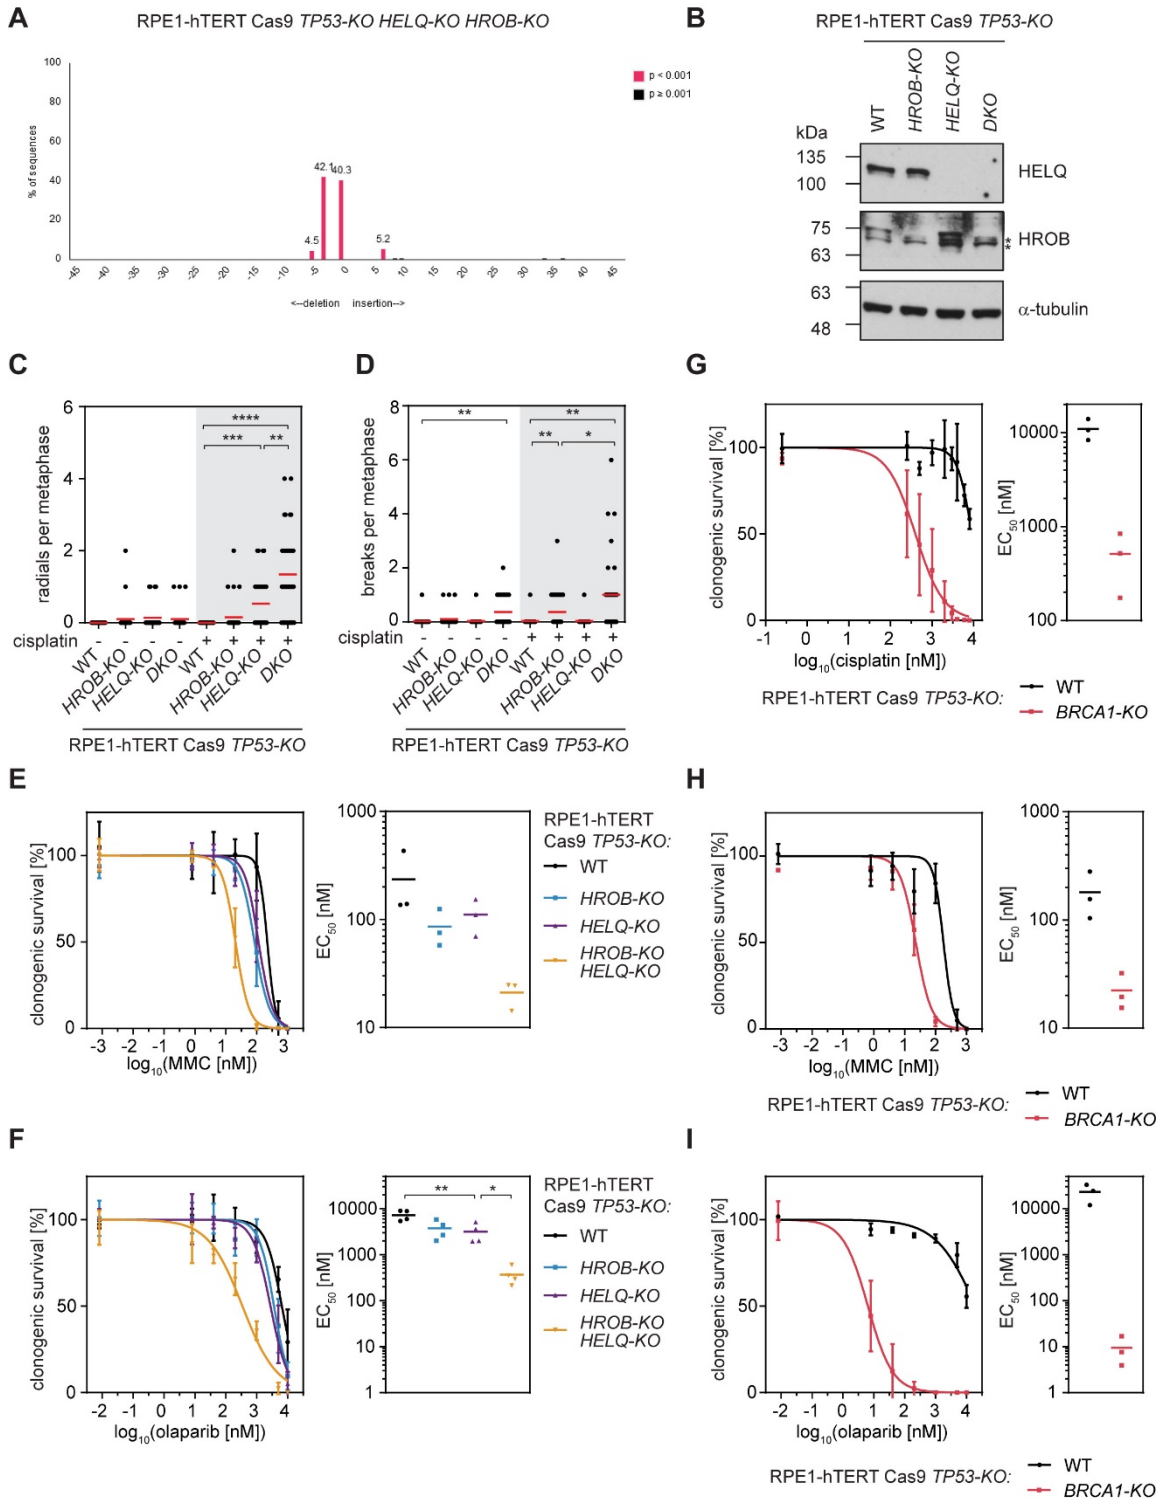



**Supplemental Figure S8: *HROB-KO* is synergistic with *HELQ-KO*.**

This figure is related to Figure 5B, C, D, E.

**A**, PCR was used to amplify the region surrounding the *HROB* sgRNA targeting site in *HELQ-KO* cells. Data shown is TIDE analysis of sequences that was used to assess indel formation in the *HROB* gene to create the *HELQ-KO HROB-KO* double knockout cell line. **B**, Lysates of RPE1 cells of the indicated genotypes were analyzed by immunoblotting with antibodies to *HELQ*, *HROB* or alpha-tubulin (loading control). DKO, *HELQ-KO HROB-KO* double knockout. Asterisks indicate non-specific bands. **C, D**, Quantification of radial chromosomes (**C**) and chromosome breaks (**D**) in metaphase spreads of RPE1 cells of the indicated genotypes, with and without cisplatin treatment. Data are pooled from three biologically independent experiments ( $\geq 30$  metaphases scored per experiment). **E, F**, Mitomycin C (MMC) (**E**) and olaparib (**F**) sensitivity of RPE1 cells of the indicated genotypes. Left panels, quantification of colony formation. Lines show a nonlinear least-squares fit to a normalized dose-response model with a variable slope. Right panels,  $EC_{50}$  values calculated from fitted curves. Lines indicate mean. Data are from three (**E**) or four (**F**) biologically independent experiments. **G, H, I**, Cisplatin (**G**), MMC (**H**) and olaparib (**I**) sensitivity of RPE1 wild type (WT) and RPE1 *BRCA1-KO* (*BRCA1-KO*) cells. Left, quantification of colony formation. Lines show a nonlinear least-squares fit to a normalized dose-response model with a variable slope. Right,  $EC_{50}$  values calculated from fitted curves. Lines indicate mean. Error bars indicate standard deviation (n=3 biologically independent experiments). \* $P \leq 0.05$ , \*\* $P \leq 0.01$ , \*\*\* $P \leq 0.001$ , \*\*\*\* $P \leq 0.0001$ .  $P$  values in **B** and **C** are from unpaired two-tailed t-tests.  $P$  values in **F** are from paired two-tailed t-tests.

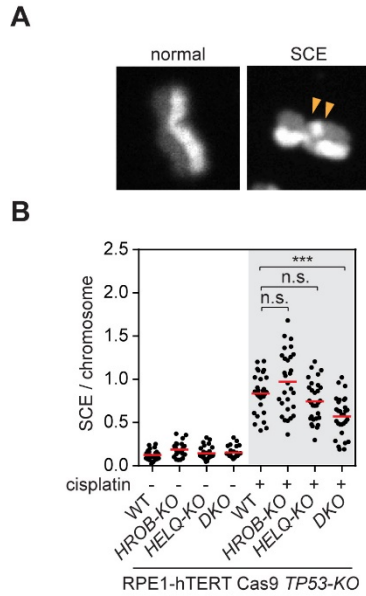

**Supplemental Figure S9: *HROB-KO HELQ-KO* double knockout cells show a reduced number of sister chromatid exchanges after cisplatin treatment.**

This figure is related to Figure 5 D, E.

**A, B,** RPE1 cells of the indicated genotypes were treated with 8  $\mu$ M cisplatin for 1 h and recovered in medium without cisplatin for 24 h before metaphase spread preparation. **A,** Representative images of a normal chromosome and a chromosome with sister chromatid exchanges (SCE). **B,** Quantification of sister chromatid exchanges on metaphase spreads of untreated or cisplatin-treated cells. DKO, *HELQ-KO HROB-KO* double knockout. Red lines indicate means ( $n=3$  biologically independent experiments). \*\*\*  $P \leq 0.001$ , n.s.  $P > 0.05$ .  $P$ -values are from non-paired two-tailed t-tests.

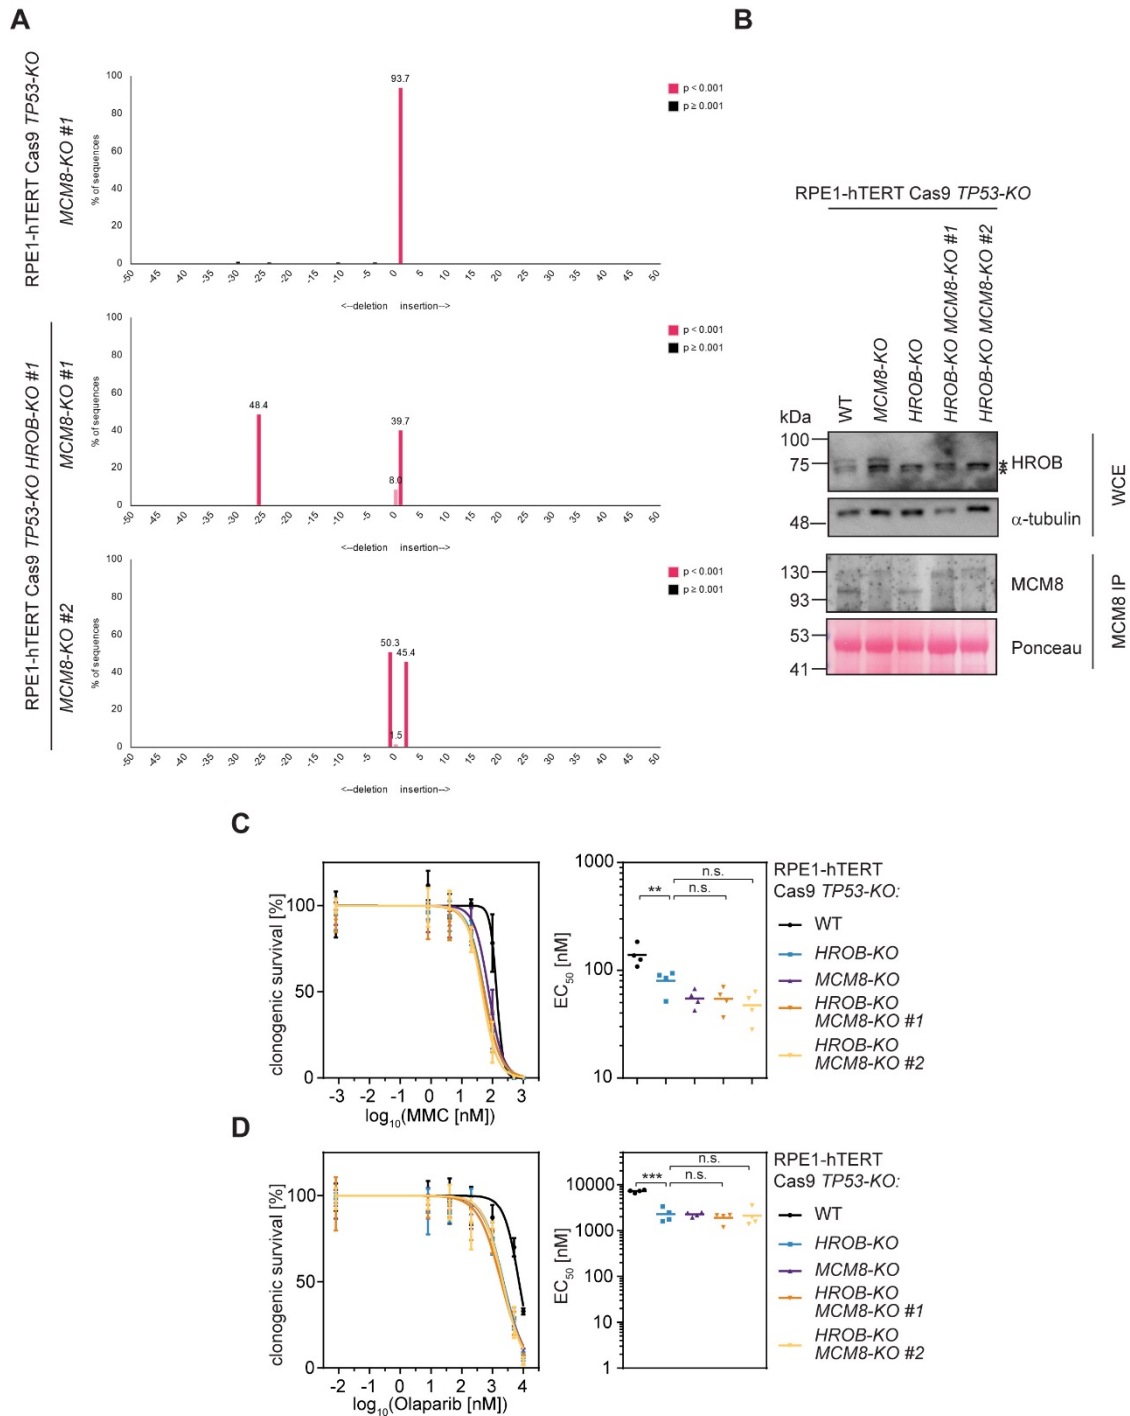

### Supplemental Figure S10: *HROB-KO* is epistatic with *MCM8-KO*.

This figure is related to Figure 5F, G.

**A**, PCR was used to amplify the region surrounding the *MCM8* sgRNA targeting site in the indicated clones. Data shown is TIDE analysis of sequences that was used to assess indel formation in the *MCM8-KO* single knockout and the *HROB-KO MCM8-KO* double knockout cell lines. **B**, whole cell extracts (WCE, upper two panels) from RPE1 cells of the indicated genotypes were analyzed by immunoblotting with antibodies to HROB and alpha-tubulin (loading control). MCM8 was only detected by immunoblotting after prior enrichment by immunoprecipitation (IP, lower two panels). Anti-MCM8 immunoprecipitates from cell lysates were probed with anti-MCM8 antibodies. Ponceau S staining served as a loading control. Asterisks indicate nonspecific bands. **C**, **D**, Mitomycin C (MMC) (**C**) and olaparib (**D**) sensitivity of RPE1 cells with indicated genotypes. Left panels, quantification of colony formation. Lines show a nonlinear least-squares fit to a normalized dose-response model with a variable slope. Right panels,  $EC_{50}$  values calculated from fitted curves. Lines indicate mean. Error bars indicate standard deviation ( $n=4$  biologically independent experiments).  $**P \leq 0.01$ ,  $***P \leq 0.001$ , n.s.  $P > 0.05$ .  $P$  values in c and d are from paired two-tailed t-tests.

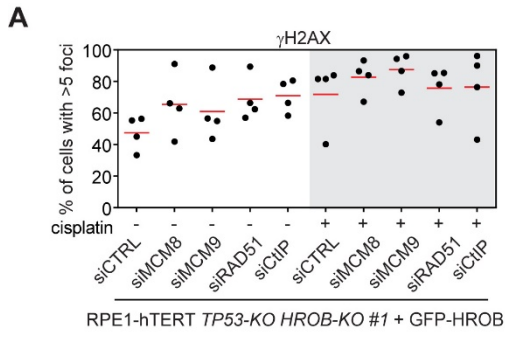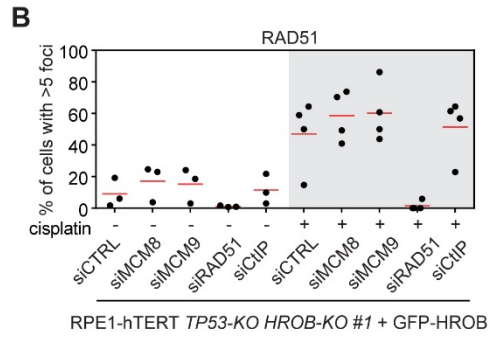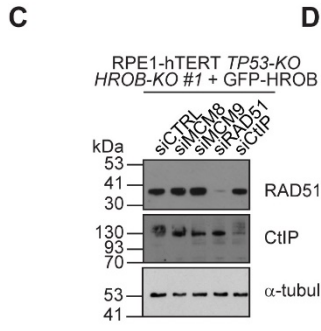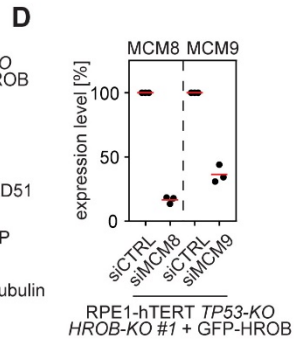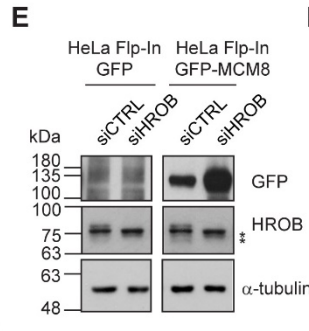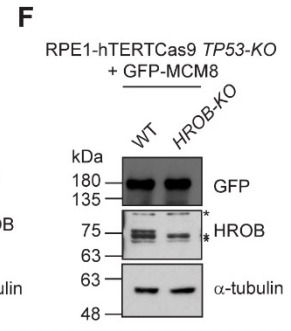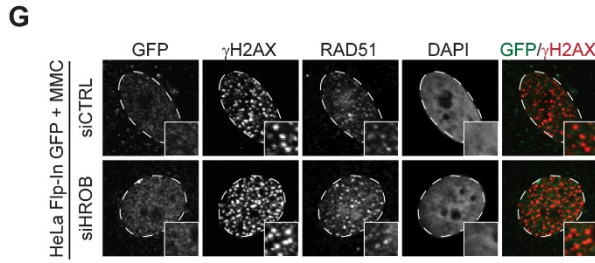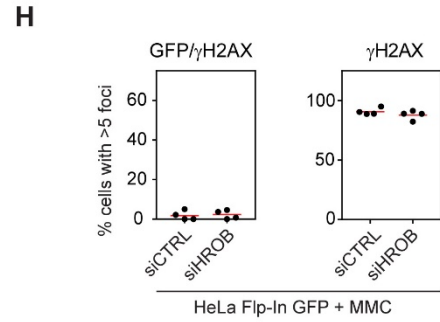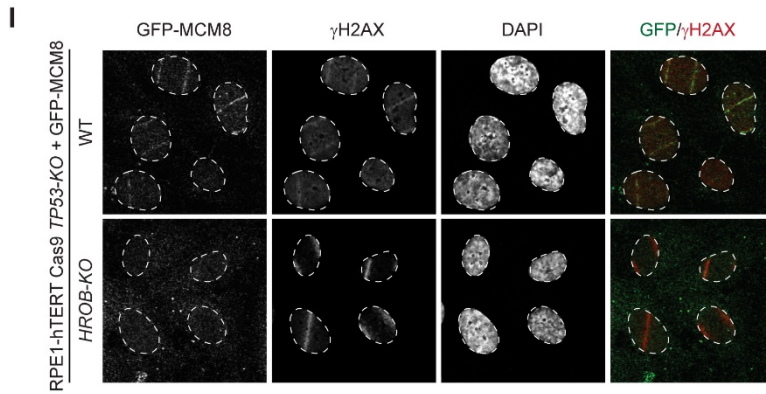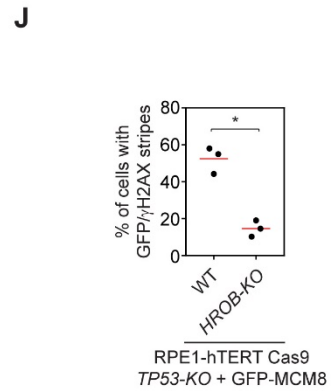

**Supplemental Figure S11: Controls for GFP-HROB and GFP-MCM8 localization.**

This figure is related to Figure 6A, B, C.

**A, B**, RPE1 *HROB-KO #1* + GFP-HROB cells were transfected with the indicated siRNAs and were left untreated or were treated with 8  $\mu$ M cisplatin treatment for 4 h prior to recovery in medium without cisplatin for 20 h. Quantification of  $\gamma$ H2AX (**A**) or RAD51/ $\gamma$ H2AX colocalizing (**B**) foci in cells with and without cisplatin treatment. Red line indicates mean (n=4 biologically independent experiments). **C**, Lysates of RPE1 *HROB-KO #1* + GFP-HROB cells transfected with the indicated siRNAs were analyzed by immunoblotting with antibodies to RAD51, CtIP and alpha-tubulin (loading control). **D**, Quantification of relative MCM8 and MCM9 mRNA levels in RPE1-hTERT Cas9 *TP53-KO* cells transfected with indicated siRNAs. GAPDH mRNA served as internal normalization standard for each sample. Data are represented as percentage of mRNA levels in cells transfected with non-targeting siRNA (siCTRL). Red line indicates mean (n=3 biologically independent experiments). **E**, Lysates of HeLa Flp-In GFP and HeLa Flp-In GFP-MCM8 cells transfected with indicated siRNAs were analyzed by immunoblotting with antibodies to GFP, HROB or alpha-tubulin (loading control). Asterisks indicate non-specific bands. **F**, Lysates of RPE1 cells with the indicated genotype were analyzed by immunoblotting as in **E**. **G, H**, HeLa Flp-In GFP cells were transfected with the indicated siRNAs and treated with 60 nM mitomycin C (MMC) for 24 h. **G**, Representative images of cells stained with the indicated antibodies. **H**, Quantification of GFP/ $\gamma$ H2AX colocalizing foci (left) or  $\gamma$ H2AX foci (right). Red line indicate means. Data are from four biologically independent experiments. **I**, Representative images of cells stained with indicated antibodies after laser microirradiation. **J**, Quantification of cells with GFP-MCM8/ $\gamma$ H2AX colocalizing stripes. Red line indicates mean (n=3 biologically independent experiments). \* $P \leq 0.05$ .  $P$ -value in **D** is from paired, two-tailed t-tests. WT, wild type.

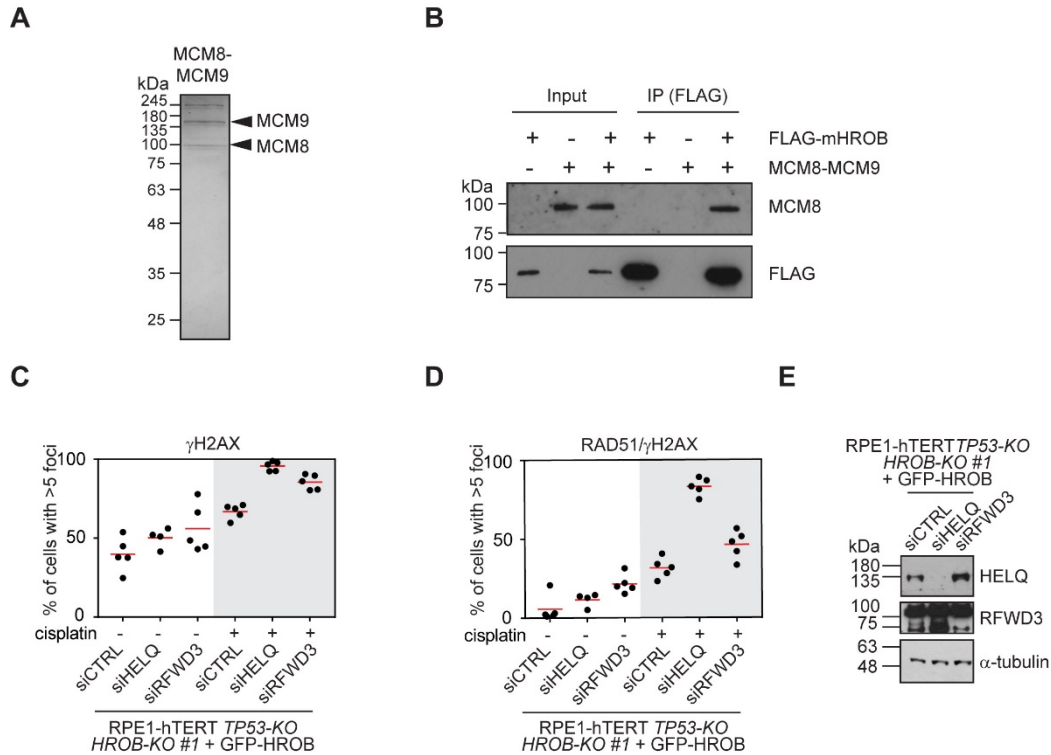

**Supplemental Figure S12: HROB and the MCM8-MCM9 complex interact directly *in vitro* and controls for GFP-HROB localization experiments in Figure 6.**

This figure is related to Figure 6D, E, F.

**A**, SDS-PAGE analysis of the purified MCM8-MCM9 complex. **B**, Purified FLAG-mHROB and MCM8-MCM9 were mixed as indicated, subjected to FLAG-immunoprecipitation (IP), and analyzed by immunoblotting with antibodies to MCM8 and FLAG. **C**, **D**, RPE1 *HROB-KO #1* + GFP-HROB cells were transfected with indicated siRNAs and were left untreated or treated with 8  $\mu$ M cisplatin for 4 h prior to recovery in medium without cisplatin for 20 h. Quantification of  $\gamma$ H2AX (**c**) and RAD51/ $\gamma$ H2AX colocalizing (**D**) foci. Red line indicates mean (n=5 biologically independent experiments). **E**, Lysates from RPE1 *HROB-KO #1* + GFP-HROB cells transfected with the indicated siRNAs were analyzed by immunoblotting with antibodies to HELQ, RFWD3 and alpha -tubulin (loading control).



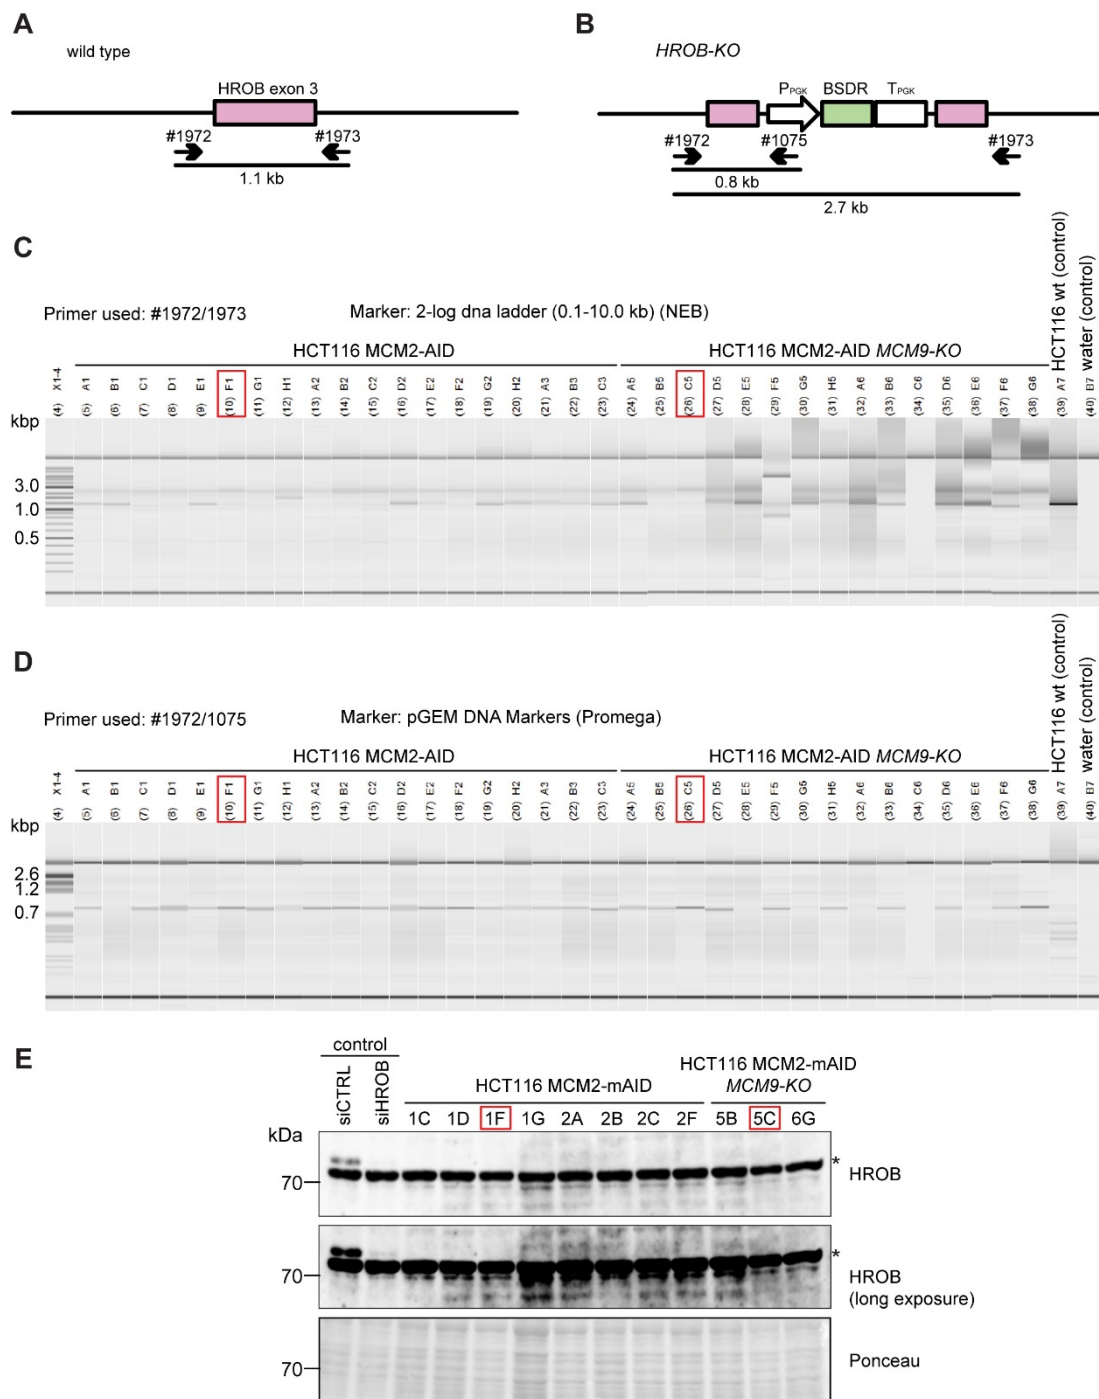

### Supplemental Figure S13: Validation of HCT116 *MCM2-mAID HROB-KO* clones.

This figure is related to Figure 6G, H.

**A**, Schematic representation of wild type genomic *HROB* exon 3. **B**, Schematic representation of the *HROB* exon 3 genomic locus after integration of the blasticidin selection cassette at the CRISPR guide RNA targeting sequence to create *HROB-KO* mutants in HCT116 *MCM2-mAID* cell lines. P<sub>PGK</sub>, PGK promoter; BSDR, blasticidin resistance gene; T<sub>PGK</sub>, PGK terminator. Arrows indicate primer annealing sites. Horizontal black lines indicate resulting PCR products. **C**, **D**, PCR primers surrounding the targeting site were used to amplify the region of interest from isolated clones and were analyzed by MultiNA. **E**, Immunoblotting of whole cell extracts from isolated clones using the HROB antibody. Red boxes indicated cell clones used for the EdU incorporation assay in Fig. 6G, H. HCT116 *MCM2-mAID* cells transfected with negative control (siCTRL) or HROB siRNA were used as controls for the presence of HROB. Asterisks indicated non-specific bands. Loading was controlled by staining the membrane with Ponceau S.
